# Supplementary material
Source: bioRxiv or medRxiv preprint supplement (https://www.biorxiv.org/highwire/filestream/47341/field_highwire_adjunct_files/0/158907-1.pdf)

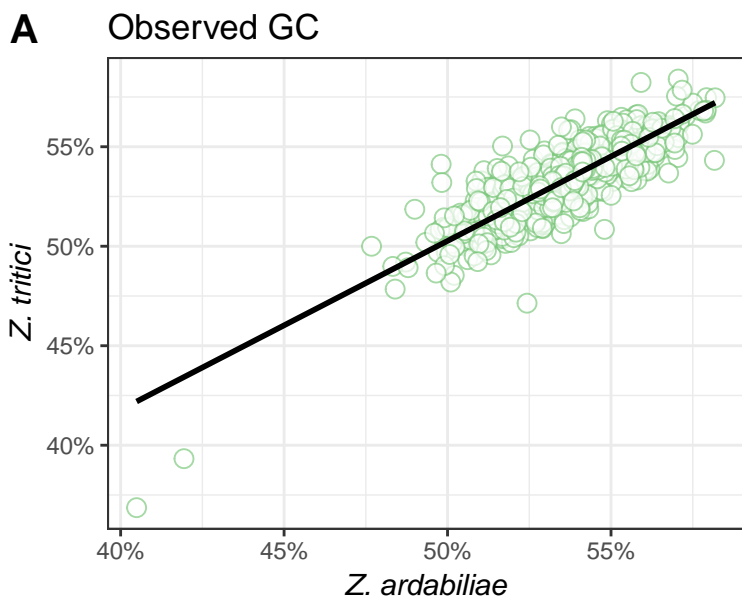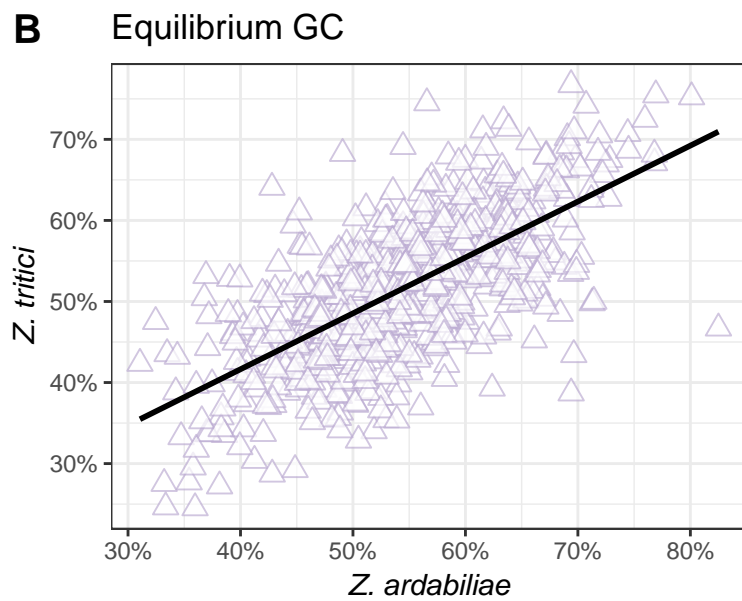

**C**

Type ○ GCobs △ GCeq

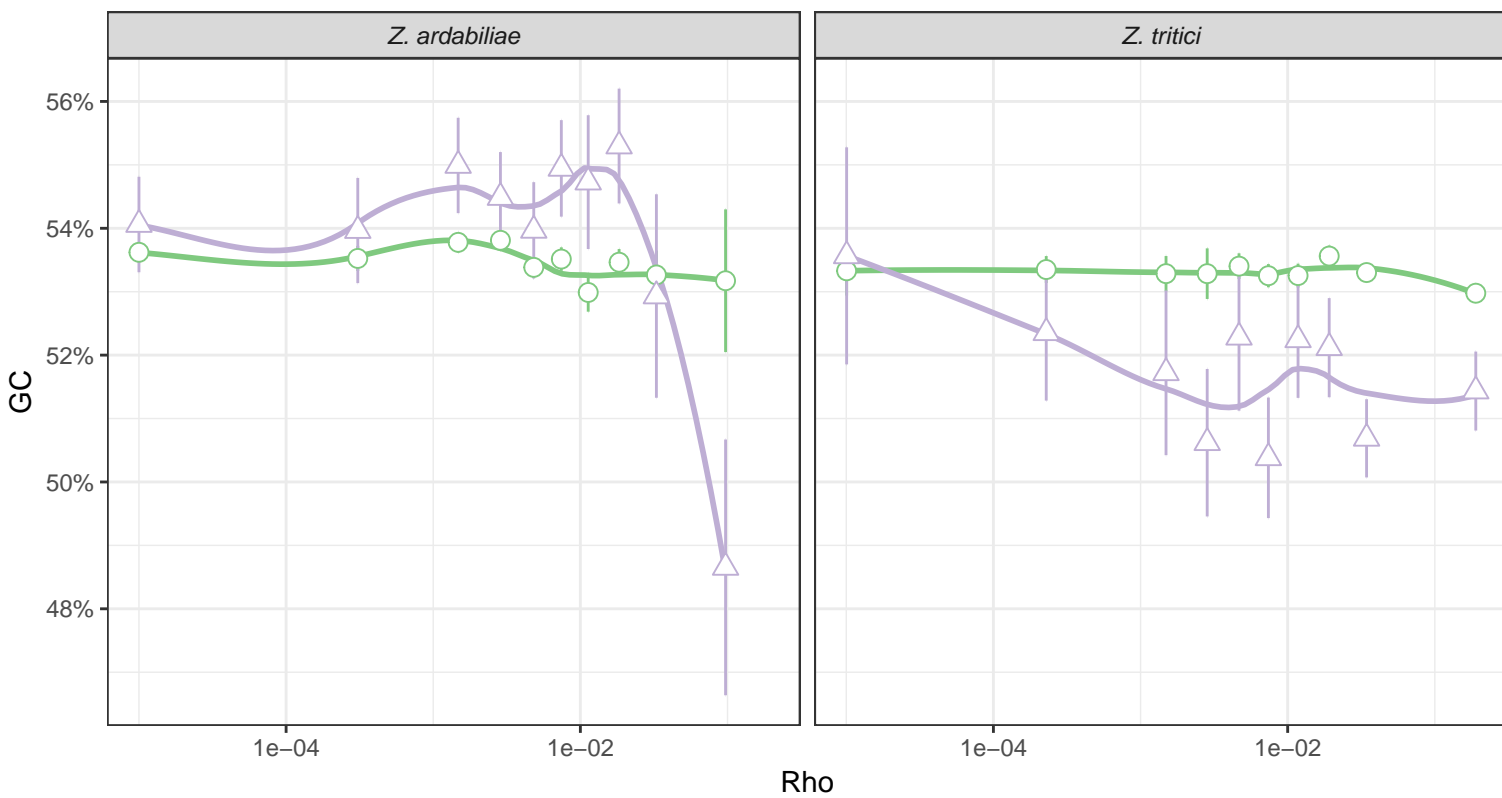

Supplement: Supplementary file [file 158907-1.pdf]
